# Supplementary material for: Modeling RET-Rearranged Non-Small Cell Lung Cancer (NSCLC): Generation of Lung Progenitor Cells (LPCs) from Patient-Derived Induced Pluripotent Stem Cells (iPSCs)
Source: MDPI journal article supplement (doi:10.3390/cells12242847), 2023-12-15
Supplement: s1 [file s1]

## Supplementary material

### Supplementary figures

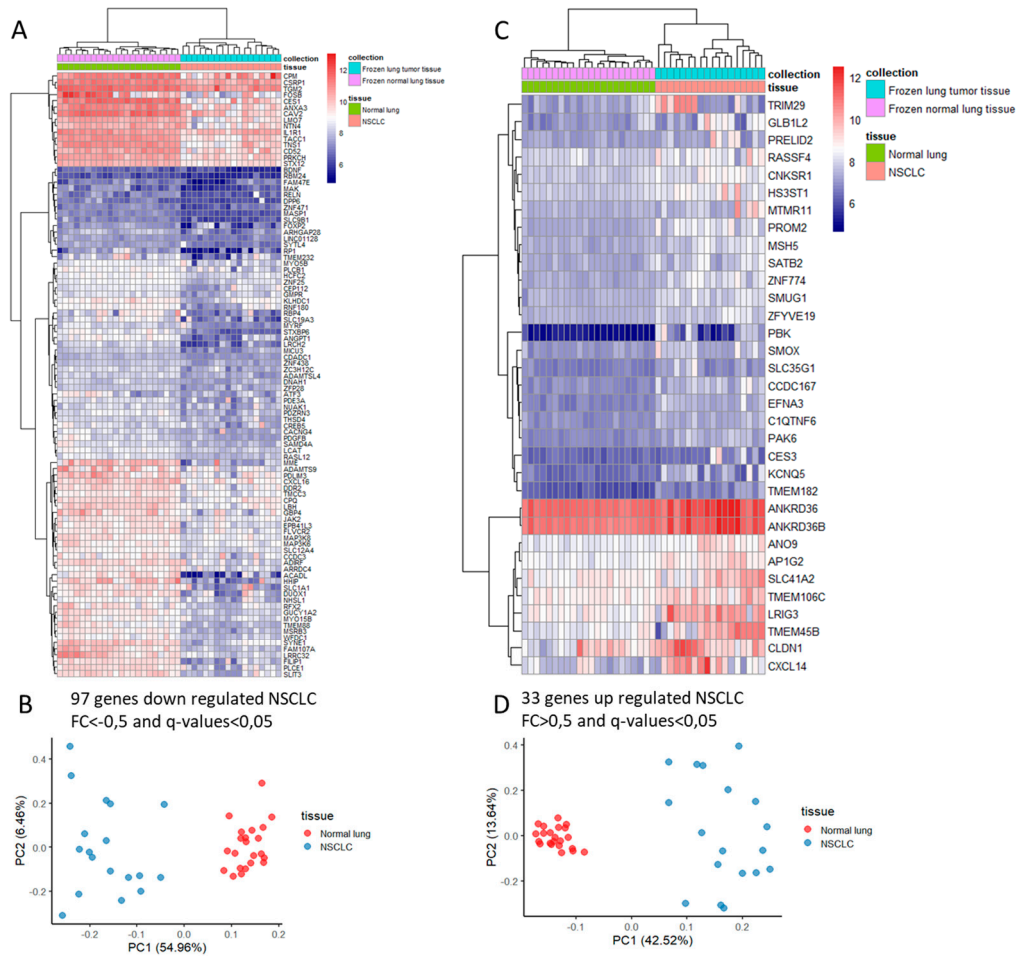

**Supplemental Figure S1:** (A) Expression heatmap (GSE44077) of the 97 RET<sup>C634Y</sup>-dependent repressed genes in NSCLC tumors. (B) Unsupervised principal component analysis based on the 97 repressed RET<sup>C634Y</sup>-dependent genes in NSCLC tumors (GSE44077). (C) Expression heatmap (GSE44077) of the 33 upregulated RET<sup>C634Y</sup>-dependent genes in NSCLC tumors. (D) Unsupervised principal component analysis based on the 33 upregulated RET<sup>C634Y</sup>-dependent genes in NSCLC tumors (GSE44077).

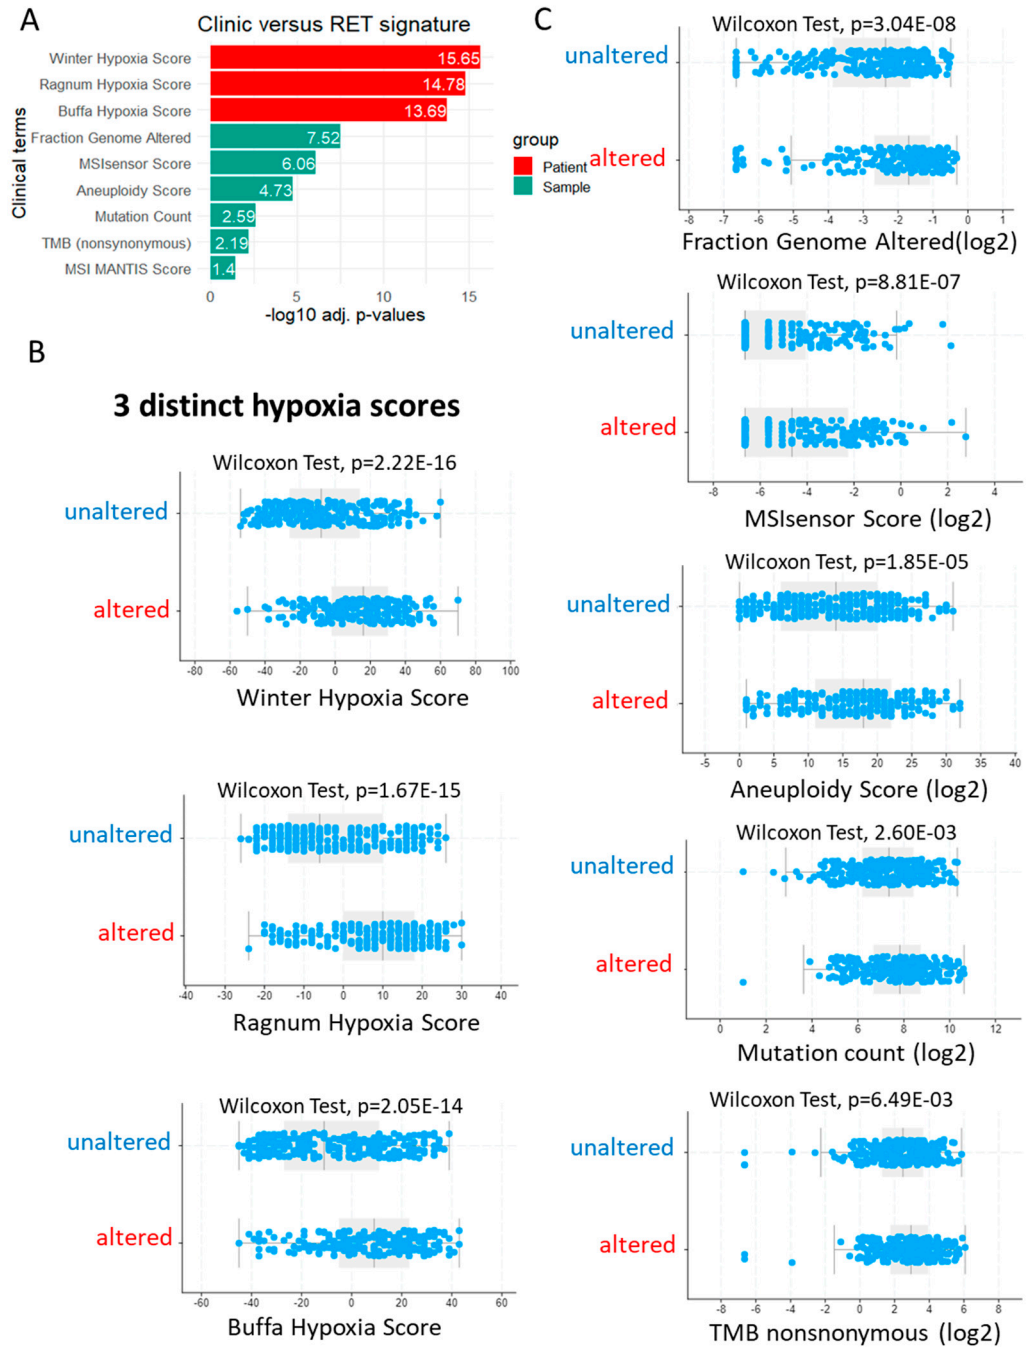

**Supplemental Figure S2: Significant clinical associations found with RET 10 genes signature in lung adenocarcinoma tumors from TCGA cohort: (A)** Barplot of significant clinical parameters found associated with the over expression of the RET 10 genes signature in TCGA lung adenocarcinoma cohort. **(B)** Significant associations with 3 distinct hypoxia score. **(C)** Significant associations with sample parameters.

#### Supplementary tables

**Supplementary Table S1: Primers used for qRT-PCR**

| Primers    | Sequence               |
|------------|------------------------|
| ACTIN_FW   | CACCATGCGCAATGAGCGGTTC |
| ACTIN_RV   | AGGTCTTTGCGGATGTCCACGT |
| C1QTNF6_FW | GGTCAAGGGTTCTGTGAGGAG  |
| C1QTNF6_RV | TCAGATGACTTTGGTGGAAGG  |

|           |                        |
|-----------|------------------------|
| CXCR4_FW  | CCCATCCTCTATGCTTTCCTTG |
| CXCR4_RV  | GTCCACCTCGCTTTCCTTTG   |
| FOXA2_FW  | GCCGCAGATACCTCCTACTACC |
| FOXA2_RV  | CCACTTGCTCTCTCACTTGTCC |
| NKX2-1_FW | CTCGCTCATTGTTGGCGAC    |
| NKX2-1_RV | CGTGTGCTTTGGACTCATCG   |
| PROM2_FW  | AGGCTGGAGAAGGATGTATGG  |
| PROM2_RV  | CAACTCTGAAGGGAAGGATTG  |
| RET_FW    | CATCAGCAAAGACCTGGAGAAG |
| RET_RV    | AATCAGGGAGTCAGATGGAGTG |
| SOX17_FW  | CTGCAACTATCCTGACGTGTG  |
| SOX17_RV  | ACCCAGGAGTCTGAGGATTTC  |
| SOX2_FW   | CGAACCATCTCTGTGGTCTTG  |
| SOX2_RV   | ATTACCAACGGTGTCAACCTG  |

**Supplementary Table S2: RET<sup>C634Y</sup>-dependent repressed gene signature in NSCLC tumor**

| Gene    | logFC  | AveExpr | P.Value  | adj.P.Val |
|---------|--------|---------|----------|-----------|
| ACADL   | -2.799 | 8.126   | 7.87E-12 | 2.33E-10  |
| HHIP    | -2.608 | 8.820   | 5.85E-12 | 1.84E-10  |
| MME     | -2.442 | 9.065   | 1.24E-11 | 3.46E-10  |
| FOSB    | -2.250 | 9.783   | 7.15E-07 | 4.93E-06  |
| CES1    | -2.109 | 10.597  | 1.49E-13 | 8.32E-12  |
| STXBP6  | -2.023 | 7.788   | 1.28E-16 | 3.21E-14  |
| FILIP1  | -1.912 | 8.713   | 1.97E-12 | 7.07E-11  |
| FAM107A | -1.875 | 8.948   | 1.05E-15 | 1.06E-13  |
| ANGPT1  | -1.748 | 8.079   | 5.36E-11 | 1.22E-09  |
| LRR32   | -1.746 | 9.229   | 1.85E-11 | 4.90E-10  |
| DUOX1   | -1.741 | 8.731   | 4.89E-08 | 4.92E-07  |
| SYNE1   | -1.733 | 9.235   | 1.78E-14 | 1.12E-12  |
| SLC19A3 | -1.700 | 7.872   | 1.67E-08 | 1.78E-07  |
| SLIT3   | -1.668 | 8.911   | 3.78E-12 | 1.27E-10  |
| CAV2    | -1.642 | 10.792  | 6.66E-13 | 3.35E-11  |
| LRCH2   | -1.605 | 7.519   | 4.85E-11 | 1.16E-09  |
| TNS1    | -1.604 | 10.258  | 1.39E-12 | 5.81E-11  |
| RBP4    | -1.571 | 7.981   | 3.33E-06 | 1.78E-05  |
| RP1     | -1.566 | 6.732   | 2.33E-06 | 1.33E-05  |
| SLC1A1  | -1.559 | 8.681   | 1.11E-05 | 5.43E-05  |
| MSRB3   | -1.554 | 8.535   | 3.01E-18 | 1.52E-15  |
| ANXA3   | -1.490 | 10.456  | 1.03E-10 | 2.16E-09  |
| TMEM88  | -1.485 | 8.495   | 1.60E-12 | 6.18E-11  |
| PLCE1   | -1.447 | 8.952   | 2.44E-09 | 3.50E-08  |
| LMO7    | -1.385 | 9.901   | 3.35E-09 | 4.56E-08  |
| GUCY1A2 | -1.339 | 8.808   | 5.65E-16 | 9.48E-14  |
| GBP4    | -1.315 | 9.199   | 1.48E-06 | 8.96E-06  |
| TACC1   | -1.310 | 10.264  | 1.11E-14 | 7.96E-13  |
| ADIRF   | -1.261 | 9.117   | 2.16E-10 | 4.17E-09  |
| ADAMTS9 | -1.222 | 9.277   | 8.72E-06 | 4.34E-05  |
| NTN4    | -1.212 | 9.852   | 1.21E-07 | 1.15E-06  |
| TMEM232 | -1.189 | 7.778   | 8.61E-04 | 2.85E-03  |
| PDLIM3  | -1.175 | 9.387   | 1.28E-06 | 8.04E-06  |

|          |        |        |          |          |
|----------|--------|--------|----------|----------|
| RNF180   | -1.129 | 8.480  | 3.46E-07 | 2.76E-06 |
| RFX2     | -1.108 | 8.774  | 8.04E-07 | 5.46E-06 |
| WFDC1    | -1.084 | 8.523  | 8.22E-11 | 1.80E-09 |
| DDR2     | -1.011 | 9.172  | 5.58E-09 | 6.52E-08 |
| CD52     | -1.008 | 10.210 | 8.76E-07 | 5.84E-06 |
| EPB41L3  | -1.007 | 8.948  | 4.70E-09 | 6.07E-08 |
| MYRF     | -1.006 | 7.804  | 1.34E-07 | 1.25E-06 |
| NHSL1    | -0.970 | 8.481  | 5.28E-06 | 2.77E-05 |
| PDGFB    | -0.952 | 8.020  | 1.13E-08 | 1.27E-07 |
| LBH      | -0.944 | 9.366  | 1.95E-09 | 2.98E-08 |
| PRKCH    | -0.943 | 10.184 | 3.35E-10 | 6.01E-09 |
| PDZRN3   | -0.913 | 8.164  | 1.45E-08 | 1.59E-07 |
| KLHDC1   | -0.902 | 8.846  | 2.79E-06 | 1.51E-05 |
| MAK      | -0.888 | 6.507  | 1.38E-05 | 6.60E-05 |
| FLVCR2   | -0.881 | 9.048  | 2.74E-07 | 2.22E-06 |
| CPM      | -0.869 | 10.868 | 1.84E-03 | 5.76E-03 |
| SLC9B1   | -0.860 | 6.647  | 5.21E-09 | 6.52E-08 |
| MICU3    | -0.853 | 7.697  | 2.41E-08 | 2.53E-07 |
| MYO15B   | -0.843 | 8.697  | 4.98E-07 | 3.48E-06 |
| STX12    | -0.823 | 9.987  | 5.43E-15 | 4.55E-13 |
| MASP1    | -0.817 | 6.646  | 9.41E-16 | 1.06E-13 |
| ARRDC4   | -0.794 | 8.844  | 8.82E-07 | 5.84E-06 |
| PDE3A    | -0.790 | 8.053  | 3.63E-04 | 1.30E-03 |
| CPQ      | -0.782 | 9.333  | 4.37E-07 | 3.21E-06 |
| ARHGAP28 | -0.770 | 7.450  | 1.68E-05 | 7.97E-05 |
| ATF3     | -0.759 | 8.029  | 3.96E-03 | 1.08E-02 |
| CSRP1    | -0.759 | 10.916 | 3.61E-10 | 6.27E-09 |
| SAMD4A   | -0.753 | 8.162  | 4.09E-07 | 3.07E-06 |
| ZC3H12C  | -0.751 | 7.988  | 9.82E-07 | 6.33E-06 |
| FOXP2    | -0.744 | 7.001  | 4.37E-03 | 1.16E-02 |
| ADAMTSL4 | -0.743 | 7.892  | 7.05E-09 | 8.06E-08 |
| SLC12A4  | -0.725 | 8.781  | 8.96E-13 | 4.10E-11 |
| CACNG4   | -0.725 | 8.033  | 1.82E-04 | 7.06E-04 |
| CXCL16   | -0.723 | 9.608  | 2.75E-06 | 1.51E-05 |
| JAK2     | -0.711 | 9.095  | 1.53E-07 | 1.33E-06 |
| BDNF     | -0.692 | 6.159  | 1.65E-06 | 9.88E-06 |
| MAP3K8   | -0.681 | 9.071  | 1.26E-06 | 8.04E-06 |
| RASL12   | -0.672 | 8.154  | 1.64E-10 | 3.31E-09 |
| MAP3K6   | -0.667 | 8.945  | 1.91E-06 | 1.12E-05 |
| CCDC3    | -0.655 | 8.783  | 4.08E-03 | 1.10E-02 |
| FAM47E   | -0.654 | 6.579  | 5.24E-03 | 1.34E-02 |
| TGM2     | -0.638 | 11.307 | 4.76E-07 | 3.39E-06 |
| TMCC3    | -0.636 | 9.015  | 1.41E-06 | 8.63E-06 |
| LCAT     | -0.629 | 8.397  | 7.96E-10 | 1.33E-08 |
| PLCB1    | -0.624 | 8.574  | 9.27E-04 | 3.03E-03 |
| ZNF471   | -0.595 | 6.774  | 7.83E-06 | 4.02E-05 |
| CDADC1   | -0.590 | 7.533  | 2.48E-10 | 4.61E-09 |
| ZNF25    | -0.590 | 8.482  | 1.89E-07 | 1.60E-06 |
| SYTL4    | -0.581 | 7.178  | 2.54E-05 | 1.16E-04 |
| GMPR     | -0.576 | 8.185  | 1.04E-04 | 4.23E-04 |
| CREB5    | -0.573 | 8.168  | 8.26E-03 | 1.98E-02 |
| RELN     | -0.559 | 6.735  | 3.58E-03 | 9.95E-03 |

|           |        |        |          |          |
|-----------|--------|--------|----------|----------|
| CEP112    | -0.550 | 8.285  | 3.92E-03 | 1.08E-02 |
| DNAH1     | -0.541 | 7.823  | 1.94E-06 | 1.12E-05 |
| NUAK1     | -0.533 | 8.024  | 2.60E-03 | 7.65E-03 |
| HCFC2     | -0.532 | 8.572  | 5.17E-08 | 5.10E-07 |
| IL1R1     | -0.520 | 10.581 | 8.56E-05 | 3.51E-04 |
| ZNF438    | -0.520 | 7.784  | 1.91E-07 | 1.60E-06 |
| ZFP28     | -0.518 | 7.814  | 8.09E-06 | 4.07E-05 |
| RBM24     | -0.514 | 5.990  | 2.35E-06 | 1.33E-05 |
| LINC01128 | -0.512 | 7.158  | 3.61E-07 | 2.83E-06 |
| MYO5B     | -0.511 | 8.388  | 6.60E-03 | 1.63E-02 |
| DPP6      | -0.509 | 6.565  | 3.43E-03 | 9.70E-03 |
| THSD4     | -0.509 | 8.041  | 3.56E-04 | 1.29E-03 |

**Supplementary Table S3: RET<sup>C634Y</sup>-dependent activated gene signature in NSCLC tumor**

| Gene     | logFC | AveExpr | P.Value  | adj.P.Val |
|----------|-------|---------|----------|-----------|
| PBK      | 1.666 | 5.811   | 2.51E-07 | 2.07E-06  |
| CXCL14   | 1.559 | 8.459   | 3.22E-05 | 1.43E-04  |
| LRIG3    | 1.327 | 9.242   | 4.04E-07 | 3.07E-06  |
| CLDN1    | 1.140 | 9.410   | 5.31E-04 | 1.83E-03  |
| TMEM45B  | 1.099 | 8.852   | 1.54E-03 | 4.87E-03  |
| TRIM29   | 1.091 | 7.748   | 5.64E-03 | 1.43E-02  |
| PROM2    | 0.845 | 7.650   | 1.51E-09 | 2.37E-08  |
| CCDC167  | 0.843 | 7.215   | 4.41E-09 | 5.83E-08  |
| KCNQ5    | 0.793 | 6.747   | 8.52E-05 | 3.51E-04  |
| EFNA3    | 0.777 | 7.043   | 4.74E-11 | 1.16E-09  |
| TMEM182  | 0.763 | 6.377   | 9.26E-10 | 1.50E-08  |
| ZNF774   | 0.743 | 7.610   | 3.08E-09 | 4.30E-08  |
| HS3ST1   | 0.701 | 8.090   | 6.98E-06 | 3.62E-05  |
| AP1G2    | 0.685 | 8.693   | 5.44E-09 | 6.52E-08  |
| SMOX     | 0.659 | 7.314   | 3.77E-05 | 1.64E-04  |
| ANKRD36B | 0.657 | 11.221  | 2.53E-06 | 1.41E-05  |
| GLB1L2   | 0.654 | 7.373   | 1.12E-02 | 2.50E-02  |
| MSH5     | 0.614 | 7.594   | 7.21E-08 | 6.97E-07  |
| SLC41A2  | 0.585 | 9.029   | 6.35E-03 | 1.58E-02  |
| ANO9     | 0.584 | 8.540   | 7.92E-06 | 4.02E-05  |
| ANKRD36  | 0.583 | 11.413  | 1.93E-05 | 9.00E-05  |
| PAK6     | 0.579 | 7.061   | 5.38E-09 | 6.52E-08  |
| CES3     | 0.579 | 6.554   | 5.20E-03 | 1.34E-02  |
| SMUG1    | 0.574 | 7.654   | 2.30E-09 | 3.41E-08  |
| CNKSR1   | 0.573 | 8.019   | 4.78E-07 | 3.39E-06  |
| MTMR11   | 0.570 | 7.669   | 8.80E-03 | 2.09E-02  |
| TMEM106C | 0.560 | 9.067   | 1.51E-04 | 6.04E-04  |
| PRELID2  | 0.557 | 7.385   | 7.27E-03 | 1.77E-02  |
| C1QTNF6  | 0.536 | 7.101   | 3.90E-08 | 4.01E-07  |
| RASSF4   | 0.534 | 8.120   | 7.02E-04 | 2.37E-03  |
| SLC35G1  | 0.531 | 6.861   | 2.95E-04 | 1.10E-03  |
| SATB2    | 0.514 | 7.550   | 7.68E-05 | 3.24E-04  |
| ZFYVE19  | 0.506 | 7.611   | 1.41E-07 | 1.25E-06  |

**Supplementary Table S4: 67 commonly regulated genes in RET<sup>C634Y</sup>-dependent gene signature and RET-KI gene signature**

| Gene symbol | Gene ID   | Description                                                           |
|-------------|-----------|-----------------------------------------------------------------------|
| ACOX1       | 51        | acyl-CoA oxidase 1                                                    |
| APBB3       | 10307     | amyloid beta precursor protein binding family B member 3              |
| ARHGAP5-AS1 | 84837     | ARHGAP5 antisense RNA 1                                               |
| ARPIN       | 348110    | actin related protein 2/3 complex inhibitor                           |
| BTBD9       | 114781    | BTB domain containing 9                                               |
| C1QTNF6     | 114904    | C1q and TNF related 6                                                 |
| C1S         | 716       | complement C1s                                                        |
| CDC42EP1    | 11135     | CDC42 effector protein 1                                              |
| CEP112      | 201134    | centrosomal protein 112                                               |
| CHST3       | 9469      | carbohydrate sulfotransferase 3                                       |
| CPM         | 1368      | carboxypeptidase M                                                    |
| CSRP1       | 1465      | cysteine and glycine rich protein 1                                   |
| CXCL1       | 2919      | C-X-C motif chemokine ligand 1                                        |
| DDR2        | 4921      | discoidin domain receptor tyrosine kinase 2                           |
| EEF1AKMT3   | 25895     | EEF1A lysine methyltransferase 3                                      |
| ELK3        | 2004      | ETS transcription factor ELK3                                         |
| FILIP1      | 27145     | filamin A interacting protein 1                                       |
| GOLGA8O     | 728047    | golgin A8 family member O                                             |
| HCFC2       | 29915     | host cell factor C2                                                   |
| HMGB1P31    | 100873894 | high mobility group box 1 pseudogene 31                               |
| HS3ST1      | 9957      | heparan sulfate-glucosamine 3-sulfotransferase 1                      |
| IL1R1       | 3554      | interleukin 1 receptor type 1                                         |
| IPP         | 3652      | intracisternal A particle-promoted polypeptide                        |
| IRF9        | 10379     | interferon regulatory factor 9                                        |
| KANTR       | 102723508 | KANTR integral membrane protein                                       |
| KCNAB3      | 9196      | potassium voltage-gated channel subfamily A regulatory beta subunit 3 |
| KCTD21-AS1  | 100289388 | KCTD21 antisense RNA 1                                                |
| KIAA1841    | NA        | NA                                                                    |
| LGALS8      | 3964      | galectin 8                                                            |
| LINC00324   | 284029    | long intergenic non-protein coding RNA 324                            |
| LINC01948   | 102467147 | long intergenic non-protein coding RNA 1948                           |
| LRIG3       | 121227    | leucine rich repeats and immunoglobulin like domains 3                |
| LRRC32      | 2615      | leucine rich repeat containing 32                                     |
| LRTOMT      | 220074    | leucine rich transmembrane and O-methyltransferase domain containing  |
| LTBP3       | 4054      | latent transforming growth factor beta binding protein 3              |
| MAPK8IP2    | 23542     | mitogen-activated protein kinase 8 interacting protein 2              |
| MEGF6       | 1953      | multiple EGF like domains 6                                           |
| MICU3       | 286097    | mitochondrial calcium uptake family member 3                          |
| MMP25-AS1   | 100507419 | MMP25 antisense RNA 1                                                 |
| MTMR11      | 10903     | myotubularin related protein 11                                       |
| NCR3LG1     | 374383    | natural killer cell cytotoxicity receptor 3 ligand 1                  |
| PDZRN3      | 23024     | PDZ domain containing ring finger 3                                   |
| PIGQ        | 9091      | phosphatidylinositol glycan anchor biosynthesis class Q               |
| RN7SL574P   | 106481079 | RNA, 7SL, cytoplasmic 574, pseudogene                                 |
| RNPEPL1     | 57140     | arginyl aminopeptidase like 1                                         |
| SCNN1D      | 6339      | sodium channel epithelial 1 subunit delta                             |
| SEPTIN5     | 5413      | septin 5                                                              |

|           |           |                                                          |
|-----------|-----------|----------------------------------------------------------|
| SLC35D1   | 23169     | solute carrier family 35 member D1                       |
| SMPD3     | 55512     | sphingomyelin phosphodiesterase 3                        |
| SOCAR     | 105373557 | serous ovarian cancer associated RNA                     |
| SREBF1    | 6720      | sterol regulatory element binding transcription factor 1 |
| ST3GAL5   | 8869      | ST3 beta-galactoside alpha-2,3-sialyltransferase 5       |
| SUN2      | 25777     | Sad1 and UNC84 domain containing 2                       |
| SYT17     | 51760     | synaptotagmin 17                                         |
| THNSL2    | 55258     | threonine synthase like 2                                |
| THSD4     | 79875     | thrombospondin type 1 domain containing 4                |
| TMEM88    | 92162     | transmembrane protein 88                                 |
| TNS1      | 7145      | tensin 1                                                 |
| TRAM2-AS1 | 401264    | TRAM2 antisense RNA 1                                    |
| TSPOAP1   | 9256      | TSPO associated protein 1                                |
| USP47     | 55031     | ubiquitin specific peptidase 47                          |
| ZBTB42    | 100128927 | zinc finger and BTB domain containing 42                 |
| ZC3H12C   | 85463     | zinc finger CCCH-type containing 12C                     |
| ZNF230    | 7773      | zinc finger protein 230                                  |
| ZNF292    | 23036     | zinc finger protein 292                                  |
| ZNF584    | 201514    | zinc finger protein 584                                  |
| ZNF688    | 146542    | zinc finger protein 688                                  |

**Supplementary Table S5: Two-way ANOVA analyzing the effect of the cells and Pralsetinib treatment on the gene expression in iRET model.** Percentage of total variation and P-value summary are shown for each gene. ns: non-significant \*, P<0.05; \*\*, P< 0.01; \*\*\*, P<0.001; \*\*\*\*, P<0.0001.

| iRET    |       | Anova results |             |              |
|---------|-------|---------------|-------------|--------------|
| Gene    | Stade | Cell lines    | Pralsetinib | Interraction |
| FOXA2   | AFE   | 97,74% ****   | 0,52% ns    | 0,01% ns     |
| NKX2-1  | LPC   | 6,97% *       | 23,49% **   | 32,89% ***   |
| C1QTNF6 | LPC   | 0,28% ns      | 48,26% ***  | 15,15% *     |
| PROM2   | LPC   | 1,12% ns      | 59,01% **** | 21,38% **    |

**Supplementary Table S6: Two-way ANOVA analyzing the effect of the cells and Pralsetinib treatment on the gene expression in PB68 model.** Percentage of total variation and P-value summary are shown for each gene. ns: non-significant \*, P<0.05; \*\*, P< 0.01; \*\*\*, P<0.001; \*\*\*\*, P<0.0001.

| PB68    |       | Anova results |             |              |
|---------|-------|---------------|-------------|--------------|
| Gene    | Stade | Cell lines    | Pralsetinib | Interraction |
| FOXA2   | AFE   | 62,30% ****   | 22,40% **** | 10,86% **    |
| NKX2-1  | LPC   | 91,58% ****   | 4,50% **    | 0,68% ns     |
| C1QTNF6 | LPC   | 67,55% ****   | 3,64% ***   | 2,90% ns     |
| PROM2   | LPC   | 88,95% ****   | 16,93% **** | 0,66% ***    |
